# Supplementary material for: In situ fabrication of a Ni–Fe–S hollow hierarchical sphere: an efficient (pre)catalyst for OER and HER
Source: Royal Society of Chemistry journal article supplement (doi:10.1039/d1nj02382a), 2021-01-01
Supplement: d1nj02382a1.pdf [file d1nj02382a1.pdf]

# Electronic Supplementary Information for

## In-situ fabrication of Ni-Fe-S hollow hierarchical sphere: An efficient (pre)catalyst for OER and HER

*Zhuoxun Yin,<sup>\*,a,\*</sup> Shu Zhang,<sup>a,\*</sup> Jinlong Li,<sup>a</sup> Shang kun Ma,<sup>a</sup> Wei Chen,<sup>a</sup> Xinzhi*

*Ma,<sup>\*,b</sup> Yang Zhou,<sup>\*,c</sup> Zhuanfang Zhang,<sup>a</sup> Xin Wang,<sup>a</sup>*

*a College of Chemistry and Chemical Engineering, Qiqihar University, Qiqihar 161006, China. E-mail: yzx@qqhru.edu.cn;*

*c Key Laboratory for Photonic and Electronic Bandgap Materials, Ministry of Education and School of Physics and Electronic Engineering, Harbin Normal University, Harbin 150025, China. E-mail: maxz@hrbnu.edu.cn*

*c College of Science, Qiqihar University, Qiqihar 161006, China. E-mail: 373133430@qq.com;*

\* Corresponding author.

E-mail addresses: yzx@qqhru.edu.cn

Corresponding author.

E-mail addresses: maxz@hrbnu.edu.cn

Corresponding author.

E-mail addresses: 373133430@qq.com

\*Zhuoxun Yin and Shu Zhang made equal contributions to this work.

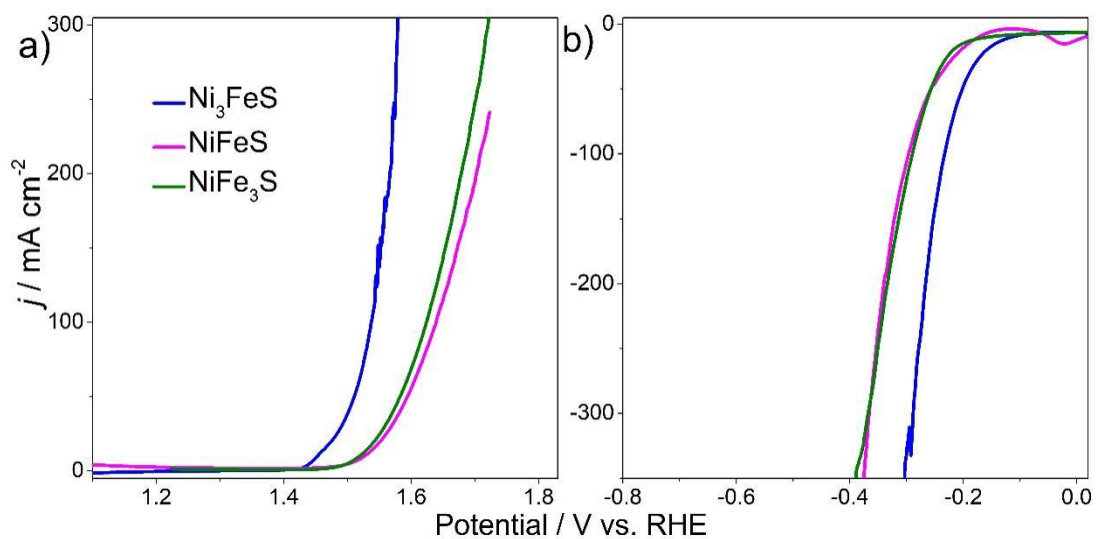

**Figure S1** Electrochemical measurements of  $\text{Ni}_x\text{Fe}_y\text{S}$ , (a) OER in 1.0 M KOH, (b) HER in 1.0 M KOH,

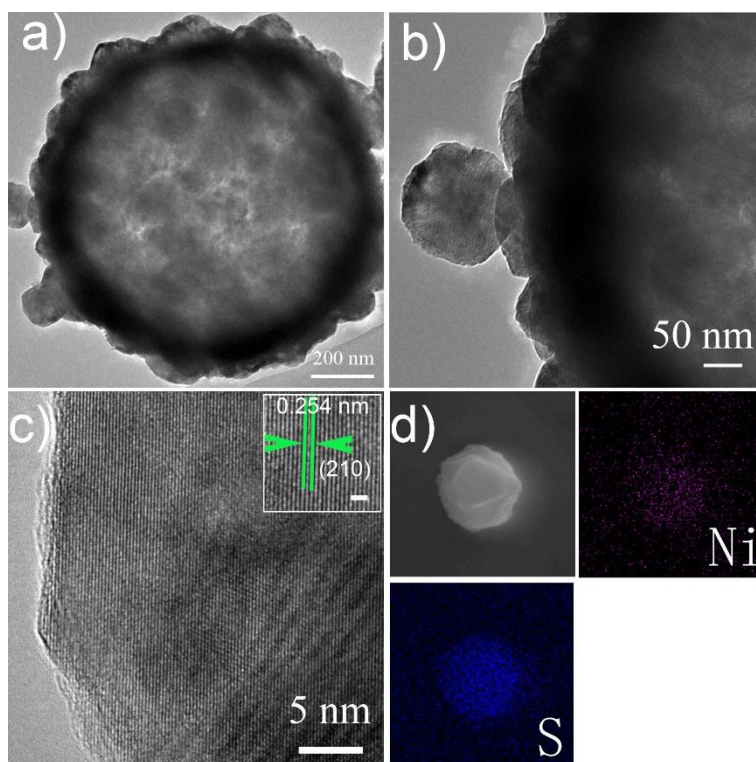

**Figure S2** Structural characterization of the Ni-S hierarchical sphere, a) low-resolution TEM image, b) the microcosmic structures of surface, c) HRTEM image and the scale bar in the inset: 1 nm, d) EDX elemental mapping images of Ni, S.

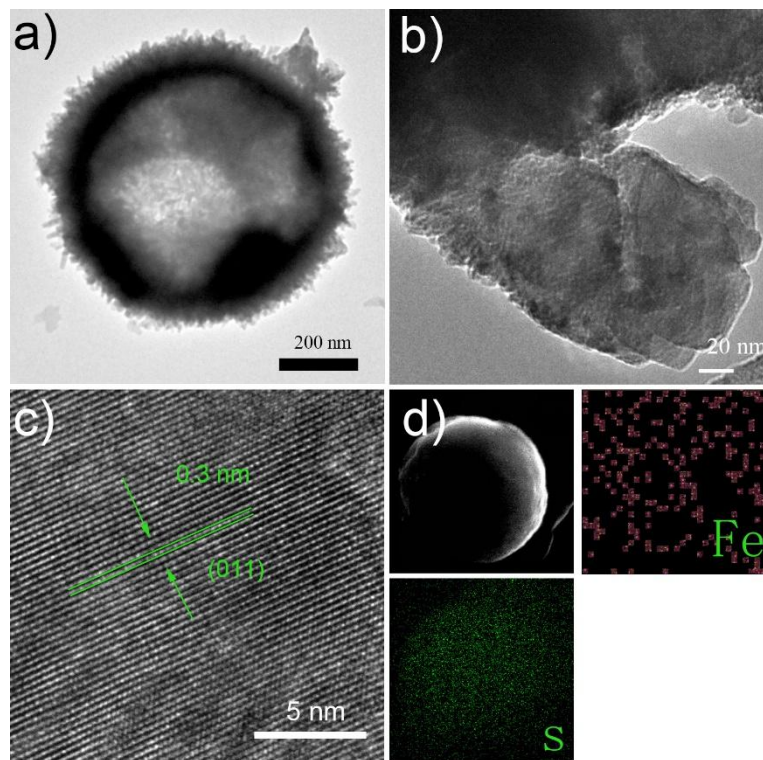

**Figure S3** Structural characterization of the Fe-S hierarchical sphere, a) low-resolution TEM image, b) the microscopic structures of surface, c) HRTEM image and the scale bar in the inset: 1 nm, d) EDX elemental mapping images of Fe, S.

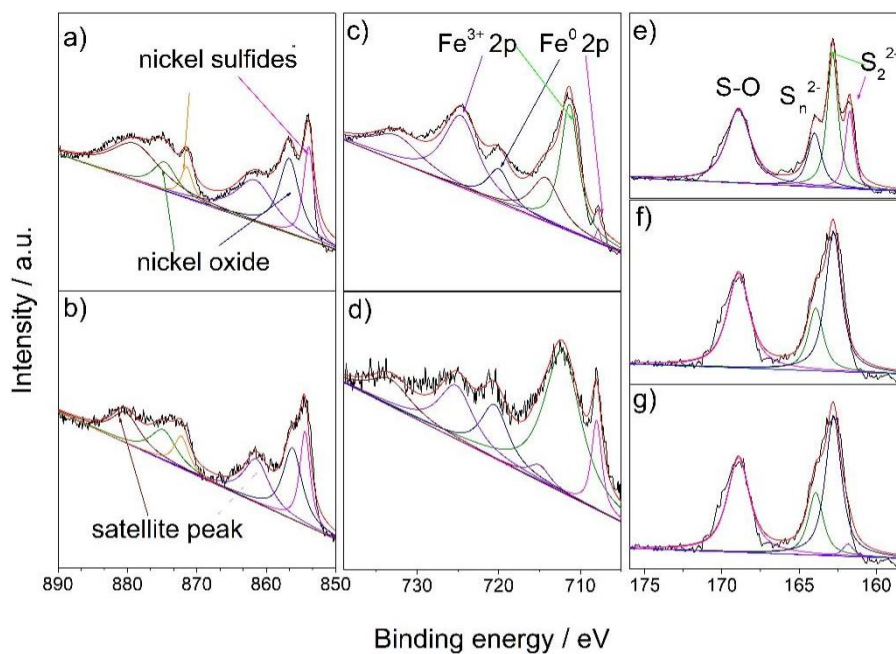

**Figure S4** Comparison of XPS spectrum of Ni-S, Fe-S and Ni-Fe-S. a,b)Ni 2p c,d) Fe 2p e,f,g) s 2p

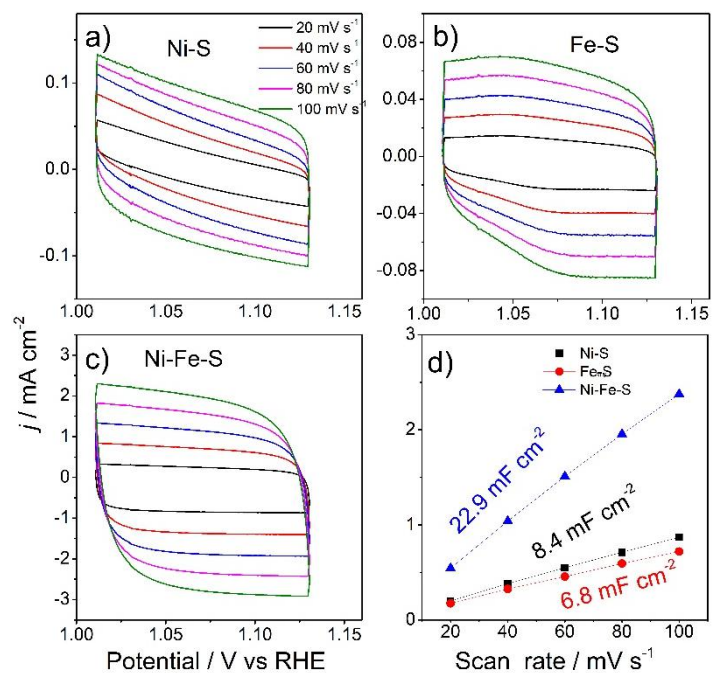

**Figure S5** The cyclic voltammograms curves of Microspheres a) Ni-S, b) Fe-S, c) Ni-Fe-S and d)  $C_{dl}$  for Ni-S, Fe-S, Ni-Fe-S toward to OER.

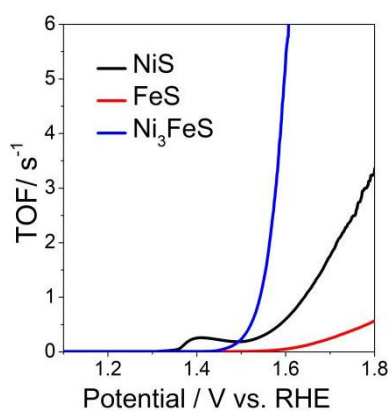

**Figure S6** The OER TOFs of the Ni-S, Fe-S, Ni-Fe-S

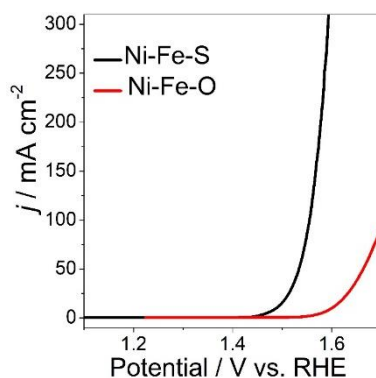

**Figure S7** The polarization curves of Ni-Fe-O and Ni-Fe-S toward the OER

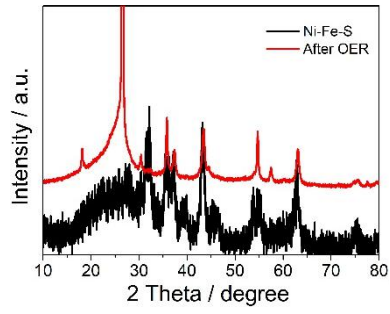

**Figure S8** XRD patterns of after the OER process for Ni-Fe-S

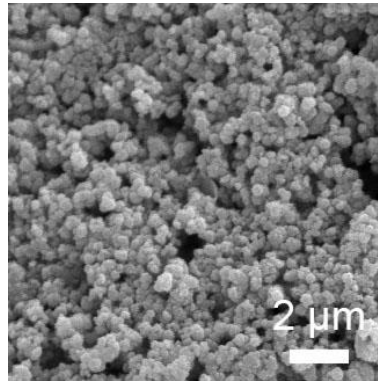

**Figure S9** SEM images of Ni-Fe-S catalysts after OER

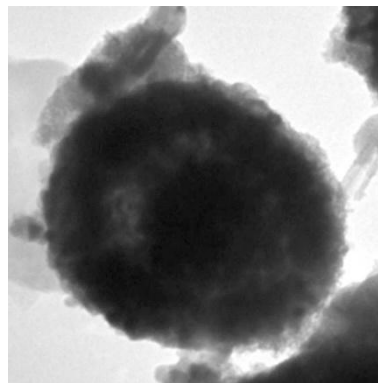

**Figure S10** TEM images of Ni-Fe-S catalysts after OER

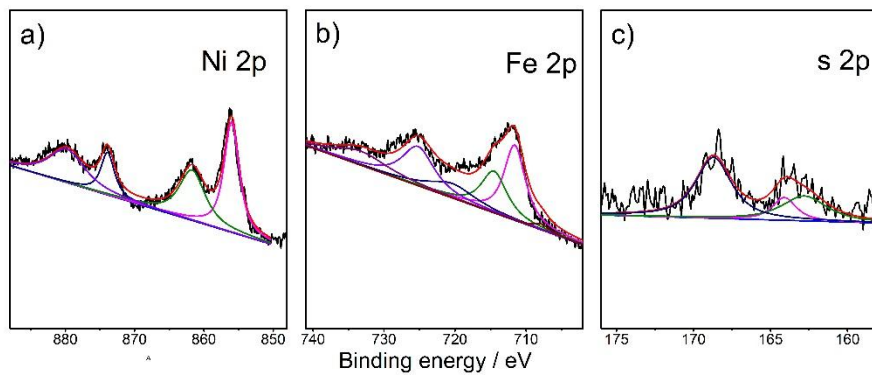

**Figure S11** The XPS spectrum of Ni-Fe-S after OER a) Ni 2p b) Fe 2p c) s 2p

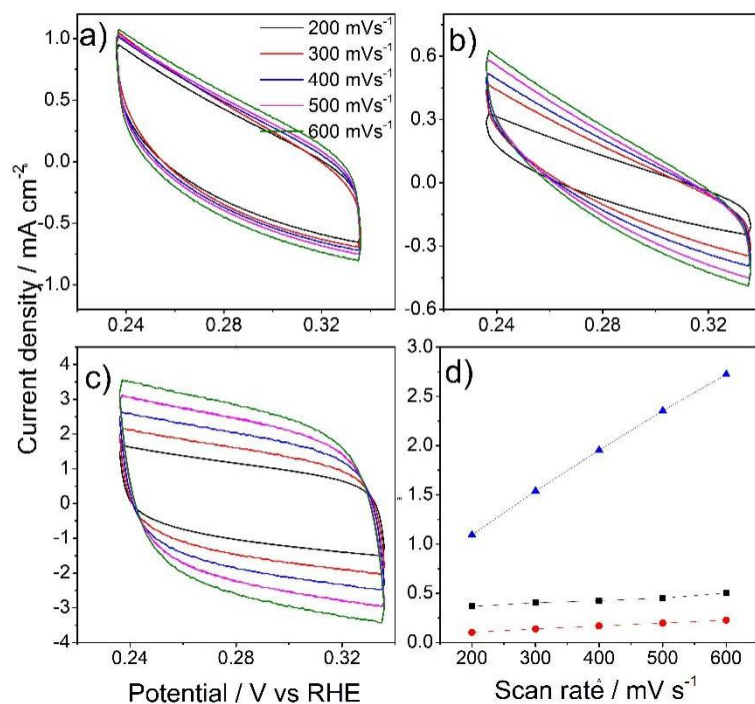

**Figure S12** The cyclic voltammograms curves of Microspheres a) Ni-S, b) Fe-S, c) Ni-Fe-S and d)  $C_{dl}$  for Ni-S, Fe-S, Ni-Fe-S toward to HER.

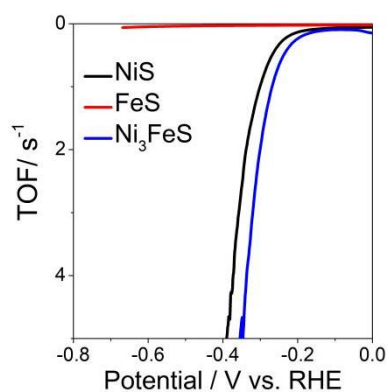

**Figure S 13** The HER TOFs of the Ni-S, Fe-S, Ni-Fe-S

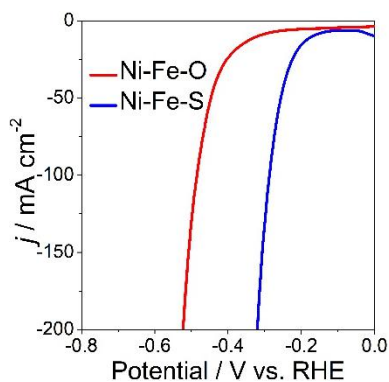

**Figure S 14** The polarization curves of Ni-Fe-O and Ni-Fe-S toward the HER

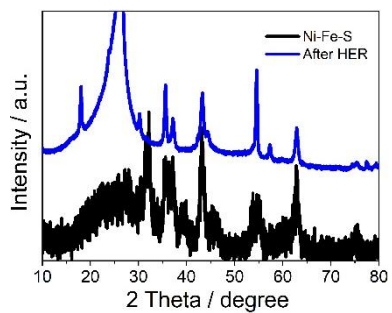

**Figure S15** XRD patterns of after the OER process for Ni-Fe-S

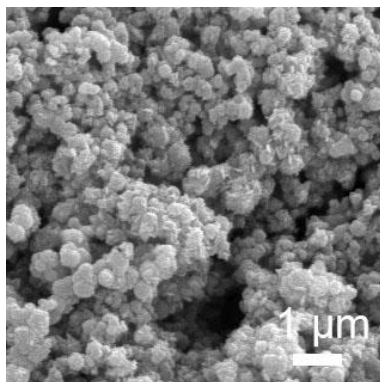

**Figure S16** SEM images of Ni-Fe-S catalysts after HER

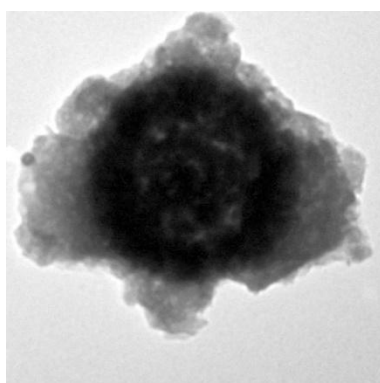

**Figure S17** TEM images of Ni-Fe-S catalysts after HER

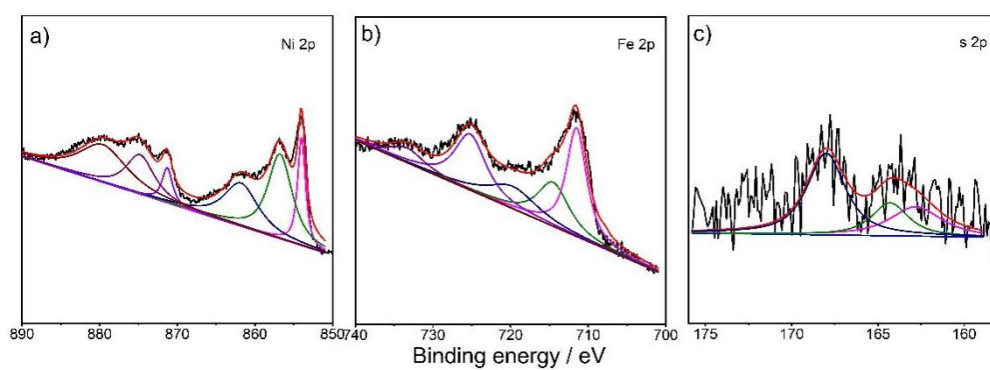

**Figure S18** The XPS spectrum of Ni-Fe-S after HER a) Ni 2p b) Fe 2p c) s 2p

**Table S1.** The detailed parameters of Ni-S、 Fe-S, Ni-Fe-S and IrO<sub>2</sub> toward the OER.

|                                            | <b>Ni-S</b>                        | <b>Fe-S</b>                        | <b>Ni-Fe-S</b>                     | <b>IrO<sub>2</sub></b>             |
|--------------------------------------------|------------------------------------|------------------------------------|------------------------------------|------------------------------------|
| Fe/Ni                                      | ----                               | ----                               | 1/3                                | ----                               |
| Overpotential<br>at 10 mA cm <sup>-2</sup> | 290 mV                             | 400 mV                             | 223 mV                             | 280 mV                             |
| anodic peak<br>position                    | 1.41 V vs. RHE                     | --                                 | --                                 | --                                 |
| Rct                                        | 1.6 Ω cm <sup>2</sup>              | 1.8 Ω cm <sup>2</sup>              | 1.3 Ω cm <sup>2</sup>              | --                                 |
| Cdl                                        | 8.4 mF cm <sup>-2</sup>            | 6.8 mF cm <sup>-2</sup>            | 22.9 mF cm <sup>-2</sup>           | --                                 |
| surface area                               | 105 m <sup>2</sup> g <sup>-1</sup> | 123 m <sup>2</sup> g <sup>-1</sup> | 112 m <sup>2</sup> g <sup>-1</sup> | 131 m <sup>2</sup> g <sup>-1</sup> |
| bandgap                                    | 1.4 eV                             | 0.8 eV                             | 1.2 eV                             | 0.5 eV                             |



**Table S2.** Comparison of OER activity of the Ni-Fe-S with recently reported catalyst.

| Catalysts                                                        | Overpotential at 10 mA cm <sup>-2</sup> (mV vs RHE) | Electrolyte concentration (pH) | Ref.      |
|------------------------------------------------------------------|-----------------------------------------------------|--------------------------------|-----------|
| Ni-Fe-S                                                          | 223                                                 | 14                             | This work |
| Ni/NiO@G-SH                                                      | 270                                                 | 14                             | 7         |
| Ni/Ni(OH) <sub>2</sub>                                           | 310                                                 | 14                             | 8         |
| CF@NiP <sub>x</sub>                                              | 200                                                 | 14                             | 11        |
| NiCo <sub>0.2</sub> NS/Ni/CF                                     | 228                                                 | 14                             | 12        |
| NCN/CC                                                           | 247                                                 | 14                             | 13        |
| C doped Co/Co <sub>3</sub> O <sub>4</sub> hollow spheres         | 352                                                 | 14                             | 19        |
| CoP                                                              | 280                                                 | 14                             | 20        |
| CoS <sub>2</sub> -MoS <sub>2</sub>                               | 288                                                 | 14                             | 22        |
| CoM-P-3DHFLMs                                                    | 292                                                 | 14                             | 29        |
| CoCu-ZIF@GDY                                                     | 250                                                 | 14                             | 30        |
| Ni <sub>4</sub> Cu <sub>2</sub> @C                               | 280                                                 | 14                             | 31        |
| Co/Fe                                                            | 378                                                 | 14                             | 32        |
| Ni-Mo-S/CC                                                       | 300                                                 | 14                             | 33        |
| ECT-S-Co <sub>0.37</sub> Ni <sub>0.26</sub> Fe <sub>0.37</sub> O | 232                                                 | 14                             | 34        |
| FeNi <sub>3</sub> N-Ni <sub>3</sub> S                            | 230                                                 | 14                             | 35        |
| CoCuNCNT@PC-700-2                                                | 340                                                 | 14                             | 36        |
| H-NiFe oxyphosphide                                              | 253                                                 | 14                             | 37        |
| Co-Fe-P-Se                                                       | 270                                                 | 14                             | 38        |

**Table S3.** The detailed parameters of Ni-S, Fe-S, Ni-Fe-S and IrO<sub>2</sub> toward the HER.

|                                            | <b>Ni-S</b>                        | <b>Fe-S</b>                        | <b>Ni-Fe-S</b>                     | <b>Pt</b> |
|--------------------------------------------|------------------------------------|------------------------------------|------------------------------------|-----------|
| Fe/Ni                                      | ----                               | ----                               | 1/3                                | ----      |
| Overpotential<br>at 10 mA cm <sup>-2</sup> | 228 mV                             | > 660 mV                           | 115 mV                             | 16 mV     |
| Rct                                        | 1.5 Ω cm <sup>2</sup>              | 1.6 Ω cm <sup>2</sup>              | 1.4 Ω cm <sup>2</sup>              | --        |
| Cdl                                        | 8.4 mF cm <sup>-2</sup>            | 6.8 mF cm <sup>-2</sup>            | 22.9 mF cm <sup>-2</sup>           | --        |
| surface area                               | 105 m <sup>2</sup> g <sup>-1</sup> | 123 m <sup>2</sup> g <sup>-1</sup> | 112 m <sup>2</sup> g <sup>-1</sup> | --        |
| TOF                                        | 1.4 eV                             | 0.8 eV                             | 1.2 eV                             | 0.5 eV    |

**Table S4.** Comparison of HER activity of the Ni-Fe-S with recently reported catalyst.

| Catalysts                                                | Overpotential at 10 mA cm <sup>-2</sup> (mV vs RHE) | Electrolyte concentration (pH) | Ref.      |
|----------------------------------------------------------|-----------------------------------------------------|--------------------------------|-----------|
| Ni-Fe-S                                                  | 115                                                 | 14                             | This work |
| Ni/Ni(OH) <sub>2</sub>                                   | 168                                                 | 14                             | 8         |
| NiS-NiS <sub>2</sub> -Ni <sub>3</sub> S <sub>2</sub> /NF | 137                                                 | 14                             | 9         |
| NiS/NiS <sub>2</sub>                                     | 143                                                 | 14                             | 10        |
| CF@NiP <sub>x</sub>                                      | 118                                                 | 14                             | 11        |
| NiC <sub>0.2</sub> NS/Ni/CF                              | 121                                                 | 14                             | 12        |
| β-Mo <sub>2</sub> C/N                                    | 119                                                 | 0                              | 17        |
| MoO <sub>2</sub> -G                                      | >150                                                | 0                              | 23        |
| Ni <sub>2</sub> P@MoS <sub>2</sub>                       | 181                                                 | 14                             | 25        |
| Ni-Mo-S/CC                                               | 118                                                 | 14                             | 33        |

**Table S5.** Comparison of the electrochemical performance of Ni-Fe-S|Ni-Fe-S as bifunctional catalysts for overall water splitting in 1.0 M KOH with recently published results.

| Catalysts                                             | Voltage at 10 mA cm <sup>-2</sup> (V)  | Electrolyte concentration (pH) | Ref.      |
|-------------------------------------------------------|----------------------------------------|--------------------------------|-----------|
| Ni-Fe-S                                               | 1.57<br>1.59 (20 mA cm <sup>-2</sup> ) | 14                             | This work |
| Co-P films                                            | 1.65                                   | 14                             | 40        |
| Co <sub>0.9</sub> S <sub>0.58</sub> P <sub>0.42</sub> | 1.59                                   | 14                             | 41        |
| CCF LDH-60                                            | 1.68                                   | 14                             | 42        |
| NiMoN-550                                             | 1.596                                  | 14                             | 43        |
| Ni <sub>0.69</sub> Co <sub>0.31</sub> -P              | 1.59                                   | 14                             | 44        |
| Co-NiMoN NRs                                          | 1.57                                   | 14                             | 45        |
| FeNi <sub>3</sub> N/NG                                | 1.585(20 mA cm <sup>-2</sup> )         | 14                             | 46        |
| N, B co-doped Co <sub>3</sub> C                       | > 1.7                                  | 14                             | 47        |
| Mo <sub>2</sub> C@NC/Co@NGs                           | > 1.7                                  | 14                             | 48        |
| CoP                                                   | 1.58                                   | 14                             | 49        |
